# Supplementary material for: Application of Cyclocarya paliurus–Kiwifruit Composite Fermented to Enhance Antioxidant Capacity, Flavor, and Sensory Characteristics of Kiwi Wine
Source: MDPI journal article supplement (doi:10.3390/molecules29010032), 2023-12-20
Supplement: s1 [file s1]

**Supplementary Table S1.** Box–Behnken design and response values for the *C. paliurus*-kiwi wine.

| Run | Independent variable |                         |                          | Response    |       |
|-----|----------------------|-------------------------|--------------------------|-------------|-------|
|     | A                    | B                       | C                        | TFC         | TTA   |
|     | Ratio (v/v)          | Yeast addition<br>(g/L) | Initial sugar<br>(°Brix) | (mg/100 mL) | (g/L) |
| 1   | 1 (1:4)              | -1 (0.2)                | 0 (20)                   | 12.45       | 23.52 |
| 2   | 0 (1:3)              | -1                      | -1 (18)                  | 10.70       | 25.13 |
| 3   | 1                    | -1                      | 0                        | 12.71       | 24.00 |
| 4   | 0                    | -1                      | 1 (22)                   | 11.95       | 25.35 |
| 5   | -1 (1:2)             | 0 (0.3)                 | 1                        | 12.90       | 25.20 |
| 6   | 0                    | 1(0.4)                  | -1                       | 12.96       | 24.97 |
| 7   | 0                    | 0                       | 0                        | 9.93        | 25.65 |
| 8   | 0                    | 1                       | 1                        | 11.38       | 26.55 |
| 9   | 0                    | 0                       | 0                        | 9.41        | 25.97 |
| 10  | -1                   | 1                       | 0                        | 12.27       | 23.97 |
| 11  | 1                    | 0                       | -1                       | 12.55       | 25.80 |
| 12  | 1                    | 0                       | 1                        | 12.36       | 26.09 |
| 13  | 1                    | 1                       | 0                        | 12.11       | 28.59 |
| 14  | 0                    | 0                       | 0                        | 8.82        | 26.13 |
| 15  | -1                   | 0                       | -1                       | 12.36       | 25.24 |

Total flavonoid content (TFC), total titratable acidity (TTA).

**Supplementary Table S2.** Variance analysis of the regression model.

| Response       |                |                   |             |         |         |
|----------------|----------------|-------------------|-------------|---------|---------|
| value          |                |                   | Y1 TFC      |         |         |
| Item           | Sum of squares | Degree of freedom | Mean square | F value | P value |
| Model          | 23.27          | 9                 | 2.59        | 10.73** | 0.0088  |
| Residual       | 1.2            | 5                 | 0.24        |         |         |
| Lack of fit    | 0.56           | 2                 | 0.28        | 1.29    | 0.3945  |
| Pure error     | 0.65           | 3                 | 0.22        |         |         |
| R <sup>2</sup> | 0.9508         |                   |             |         |         |

  

| Response       |                |                   |             |         |          |
|----------------|----------------|-------------------|-------------|---------|----------|
| value          |                |                   | Y2 TTA      |         |          |
| Item           | Sum of squares | Degree of freedom | Mean square | F value | P value  |
| Model          | 19.79          | 6                 | 3.3         | 25.62** | < 0.0001 |
| Residual       | 1.03           | 8                 | 0.13        |         |          |
| Lack of fit    | 0.79           | 5                 | 0.16        | 2.03    | 0.2972   |
| Pure error     | 0.23           | 3                 | 0.078       |         |          |
| R <sup>2</sup> | 0.9505         |                   |             |         |          |

\*Implies a significant difference ( $P<0.05$ ), \*\*implies an extremely significant difference ( $P<0.01$ ).

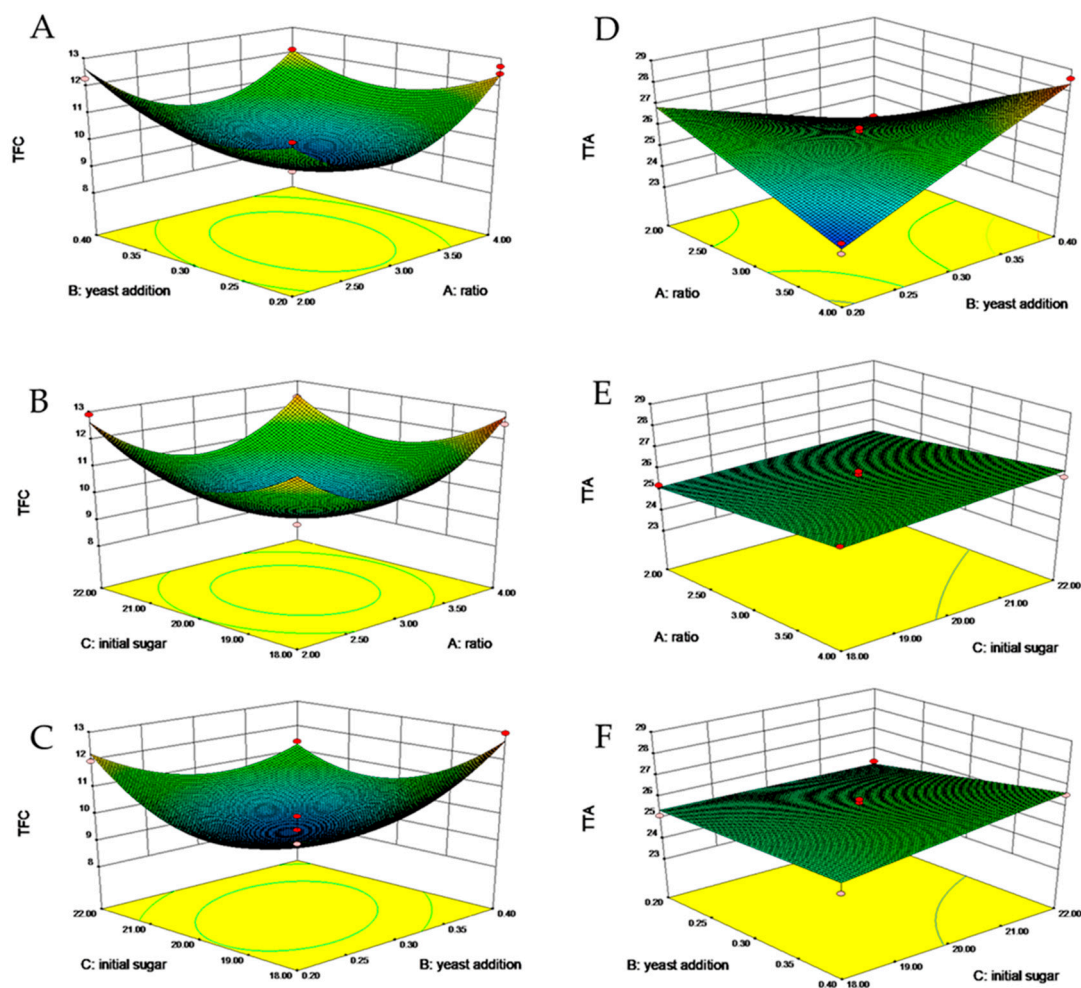

Supplementary Figure S1. Response surface results for TFC and TTA.

Supplementary Table S3. Abbreviations and concentration of volatile aroma substances in Fig. 3C.

| C.      |          |     |           |        |        |        |
|---------|----------|-----|-----------|--------|--------|--------|
| abbrevi | Volatile | CAS | paliurus- | Kiwi   | K1     | K2     |
| ation   |          |     | kiwi      | wine   | (ug/L) | (ug/L) |
|         |          |     | wine      | (ug/L) |        |        |
|         |          |     | (ug/L)    |        |        |        |

|      |                                  |          |         |         |          |        |
|------|----------------------------------|----------|---------|---------|----------|--------|
| Ac1  | Hexanoic acid                    | 142-62-1 | 0.000   | 17.426  | 0.000    | 0.000  |
| Ac2  | Acetic acid                      | 64-19-7  | 43.532  | 213.928 | 0.000    | 41.267 |
| Ac3  | Octanoic acid                    | 124-07-2 | 247.176 | 20.324  | 7.597    | 0.000  |
| Ac4  | n-Decanoic acid                  | 334-48-5 | 127.110 | 0.000   | 0.000    | 0.000  |
| Ac5  | Butyric acid                     | 107-92-6 | 0.000   | 30.761  | 0.000    | 0.000  |
| Ac6  | Benzoic acid                     | 65-85-0  | 0.000   | 0.000   | 1048.896 | 0.000  |
| Ac7  | Hexa-2, 4-dienoic acid           | 110-44-1 | 0.000   | 609.073 | 0.000    | 0.000  |
|      | 2, 6-                            |          |         |         |          |        |
| Ac8  | Pyridinedicarboxylic acid        | 499-83-2 | 0.000   | 11.365  | 0.000    | 0.000  |
|      |                                  | 4536-23- |         |         |          |        |
| Ac9  | 2-Methylhexanoic acid            | 6        | 18.158  | 0.000   | 0.000    | 0.000  |
| Ac10 | Isobutyric acid                  | 79-31-2  | 46.957  | 0.000   | 0.000    | 0.000  |
| T1   | alpha-Terpineol                  | 98-55-5  | 0.000   | 17.053  | 28.023   | 0.000  |
|      | 3-Cyclohexen-1-ol, 4-            | 20126-   |         |         |          |        |
| T2   | methyl-1-(1-methylethyl)-, (1R)- | 76-5     | 104.605 | 0.000   | 0.000    | 99.537 |
| T3   | Linalool                         | 78-70-6  | 17.696  | 69.709  | 0.000    | 0.000  |
|      |                                  | 10482-   |         |         |          |        |
| T4   | (-)-alpha-Terpineol              | 56-1     | 12.302  | 0.000   | 0.000    | 0.000  |
| T5   | Terpinen-4-ol                    | 562-74-3 | 0.000   | 30.119  | 8.750    | 0.000  |
| T6   | g-Terpinene                      | 99-85-4  | 0.000   | 0.000   | 0.000    | 61.040 |

|     |                                                         |            |        |        |        |       |
|-----|---------------------------------------------------------|------------|--------|--------|--------|-------|
| T7  | Geraniol                                                | 106-24-1   | 6.581  | 15.683 | 0.000  | 0.000 |
| T8  | Espatulenol                                             | 6750-60-3  | 12.140 | 0.000  | 0.000  | 0.000 |
| Es1 | Acetic acid, 2-chloro-,<br>nonyl ester                  | 5451-96-7  | 0.000  | 0.000  | 12.993 | 0.000 |
| Es2 | (E)-3-Hexenyl<br>butanoate                              | 53398-84-8 | 0.000  | 30.217 | 0.000  | 0.000 |
| Es3 | 7-Octenoic acid ethyl<br>ester                          | 35194-38-8 | 0.000  | 0.000  | 11.802 | 0.000 |
| Es4 | 3-Hexen-1-ol, 1-<br>acetate, (3E)-                      | 3681-82-1  | 0.000  | 17.747 | 0.000  | 0.000 |
| Es5 | Ethyl 6-heptenoate                                      | 25118-23-4 | 0.000  | 0.000  | 17.478 | 0.000 |
| Es6 | Butyl isobutyl<br>phthalate                             | 17851-53-5 | 0.000  | 45.035 | 90.423 | 0.000 |
| Es7 | 2-Hexenoic acid, ethyl<br>ester                         | 1552-67-6  | 14.244 | 0.000  | 0.000  | 0.000 |
| Es8 | (Z)-Ethyl cinnamate                                     | 4192-77-2  | 0.000  | 0.000  | 8.632  | 0.000 |
| Es9 | Pentanoic acid, 2-<br>hydroxy-4-methyl-,<br>ethyl ester | 10348-47-7 | 0.000  | 55.422 | 0.000  | 0.000 |

|      |                         |            |          |          |         |         |
|------|-------------------------|------------|----------|----------|---------|---------|
| Es10 | Ethyl malate            | 626-11-9   | 0.000    | 0.000    | 6.276   | 0.000   |
|      | 3, 3, 5-                |            |          |          |         |         |
| Es11 | Trimethylcyclohexyl     | 118-56-9   | 0.000    | 7.051    | 0.000   | 0.000   |
|      | salicylate              |            |          |          |         |         |
|      | 9, 12, 15-              |            |          |          |         |         |
| Es12 | Octadecatrienoic acid,  | 1191-41-9  | 7.903    | 0.000    | 0.000   | 0.000   |
|      | ethyl ester, (Z, Z, Z)- |            |          |          |         |         |
| Es13 | Tetradecanoic acid,     | 124-06-1   | 15.184   | 0.000    | 6.607   | 10.844  |
|      | ethyl ester             |            |          |          |         |         |
| Es14 | (E)-4-Heptenoic acid    | 54340-70-4 | 11.658   | 0.000    | 0.000   | 0.000   |
|      | ethyl ester             |            |          |          |         |         |
| Es15 | Ethyl 9-hexadecenoate   | 54546-22-4 | 20.665   | 0.000    | 0.000   | 11.199  |
| Es16 | Diethyl succinate       | 123-25-1   | 0.000    | 32.135   | 5.415   | 32.605  |
| Es17 | Ethyl butyrate          | 105-54-4   | 0.000    | 1054.841 | 0.000   | 0.000   |
| Es18 | Ethyl acetate           | 141-78-6   | 0.000    | 459.050  | 0.000   | 0.000   |
| Es19 | 3-Methylbutyl acetate   | 123-92-2   | 106.034  | 0.000    | 0.000   | 0.000   |
| Es20 | Ethyl hexanoate         | 123-66-0   | 440.015  | 132.129  | 87.723  | 21.928  |
| Es21 | Acetic acid benzyl      | 140-11-4   | 0.000    | 37.602   | 0.000   | 0.000   |
|      | ester                   |            |          |          |         |         |
| Es22 | Ethyl octanoate         | 106-32-1   | 1614.827 | 175.469  | 123.603 | 313.418 |
| Es23 | Ethyl nonanoate         | 123-29-5   | 21.621   | 0.000    | 15.040  | 0.000   |

|      |                                                 |            |          |         |         |         |
|------|-------------------------------------------------|------------|----------|---------|---------|---------|
| Es24 | Methyl benzoate                                 | 93-58-3    | 20.870   | 65.312  | 0.000   | 0.000   |
| Es25 | Ethyl decanoate                                 | 110-38-3   | 1272.027 | 79.994  | 0.000   | 826.366 |
| Es26 | Benzoic acid ethyl ester                        | 93-89-0    | 193.706  | 602.101 | 330.743 | 0.000   |
| Es27 | Ethyl 9-decenoate                               | 67233-91-4 | 21.498   | 0.000   | 0.000   | 0.000   |
| Es28 | Methyl salicylate                               | 119-36-8   | 22.598   | 0.000   | 0.000   | 0.000   |
| Es29 | Acetic acid 2-phenylethyl ester                 | 103-45-7   | 43.282   | 26.227  | 0.000   | 5.805   |
| Es30 | Ethyl dodecanoate                               | 106-33-2   | 228.126  | 0.000   | 0.000   | 152.080 |
| Es31 | Ethyl oleate                                    | 6512-99-8  | 0.000    | 0.000   | 0.000   | 15.054  |
| Es32 | Ethyl hexadecanoate                             | 628-97-7   | 59.202   | 20.130  | 36.475  | 105.355 |
| Es33 | Phenylacetic acid ethyl ester                   | 101-97-3   | 0.000    | 8.115   | 4.197   | 0.000   |
| Es34 | 9, 12-Octadecadienoic acid (Z, Z)-, ethyl ester | 544-35-4   | 0.000    | 0.000   | 0.000   | 17.433  |
| Es35 | Methyl 3-phenyl propenoate                      | 103-26-4   | 0.000    | 46.576  | 0.000   | 0.000   |
| Es36 | Ethyl heptanoate                                | 106-30-9   | 26.507   | 0.000   | 0.000   | 0.000   |
| Es37 | Methyl n-caprate                                | 110-42-9   | 0.000    | 0.000   | 0.000   | 7.004   |
| Es38 | Benzyl butyrate                                 | 103-37-7   | 0.000    | 10.929  | 15.567  | 0.000   |

|      |                                        |                |          |         |        |         |
|------|----------------------------------------|----------------|----------|---------|--------|---------|
| Es39 | 3-Phenylpropionic<br>acid ethyl ester  | 2021-28-<br>5  | 0.000    | 17.220  | 0.000  | 0.000   |
| Es40 | Octanoic acid, 3-<br>methylbutyl ester | 2035-99-<br>6  | 0.000    | 0.000   | 0.000  | 22.802  |
| Es41 | Ethyl 3-hexenoate                      | 2396-83-<br>0  | 37.858   | 0.000   | 0.000  | 0.000   |
| Es42 | Ethyl 2-furoate                        | 614-99-3       | 0.000    | 0.000   | 12.536 | 0.000   |
| Es43 | Isopentyl hexanoate                    | 2198-61-<br>0  | 16.003   | 0.000   | 0.000  | 0.000   |
| Es44 | (E, E)-Ethyl2, 4-<br>hexadienoate      | 2396-84-<br>1  | 0.000    | 202.135 | 0.000  | 0.000   |
| Es45 | Formic acid, octyl ester               | 112-32-3       | 0.000    | 0.000   | 0.000  | 7.778   |
| Es46 | Menthyl acetate                        | 89-48-5        | 0.000    | 111.448 | 0.000  | 0.000   |
| Al1  | 7-Tetradecen-1-ol,<br>(7E)-            | 37011-<br>95-3 | 0.000    | 0.000   | 7.235  | 0.000   |
| Al2  | trans-nerolidol                        | 40716-<br>66-3 | 0.000    | 5.408   | 0.000  | 0.000   |
| Al3  | 3-Methyl-1-butanol                     | 123-51-3       | 1323.320 | 176.047 | 0.000  | 725.705 |
| Al4  | 1-Hexanol                              | 111-27-3       | 56.552   | 72.399  | 0.000  | 28.394  |
| Al5  | (R, R)-2, 3-Butanediol                 | 24347-<br>58-8 | 28.559   | 0.000   | 0.000  | 0.000   |
| Al6  | Benzyl alcohol                         | 100-51-6       | 31.923   | 16.916  | 0.000  | 0.000   |



|     |                                                      |                      |         |         |        |         |
|-----|------------------------------------------------------|----------------------|---------|---------|--------|---------|
| Al7 | Phenylethyl Alcohol                                  | 60-12-8              | 572.116 | 181.042 | 0.000  | 84.450  |
| Al8 | 2-Methyl-1-propanol                                  | 78-83-1              | 0.000   | 0.000   | 0.000  | 206.058 |
| Al9 | 1-Decanol                                            | 112-30-1             | 0.000   | 0.000   | 0.000  | 8.461   |
| P1  | 2, 4-Di-tertbutylphenol                              | 96-76-4              | 8.780   | 37.449  | 10.248 | 0.000   |
| P2  | 4-Allyl-2-methoxyphenol                              | 97-53-0              | 0.000   | 0.000   | 5.998  | 0.000   |
| P3  | 2, 4, 6-Tri-tert-butylphenol                         | 732-26-3             | 0.000   | 13.098  | 0.000  | 0.000   |
| P4  | Dihydroeugenol                                       | 2785-87-7            | 0.000   | 7.685   | 0.000  | 0.000   |
| P5  | Phenol, 2-methoxy-3-(2-propenyl)-                    | 1941-12-4            | 5.238   | 0.000   | 0.000  | 0.000   |
| C1  | 3-Hydroxy-2-butanone                                 | 514-95-4             | 0.000   | 17.064  | 0.000  | 0.000   |
| C2  | Dimethylundeca-5, 9-dien-2-one                       | (E)-6, 10-10208-80-7 | 13.331  | 0.000   | 0.000  | 0.000   |
| C3  | Beta-ionone                                          | 464-17-5             | 0.000   | 0.000   | 8.787  | 0.000   |
| C4  | 2-Butanone, 4-(2, 6, 6-trimethyl-1-cyclohexen-1-yl)- | 294-62-2             | 0.000   | 0.000   | 8.514  | 0.000   |
| C5  | Geranylacetone                                       | 99-87-6              | 0.000   | 0.000   | 10.151 | 0.000   |
| C6  | 2-Oxetanone                                          | 193695-              | 0.000   | 78.754  | 0.000  | 0.000   |

|    |                                                                                   |              |        |        |        |        |
|----|-----------------------------------------------------------------------------------|--------------|--------|--------|--------|--------|
|    |                                                                                   | 14-6         |        |        |        |        |
| H1 | 1, 5, 5-Trimethyl-6-methylenecyclohexene                                          | 514-95-4     | 15.213 | 0.000  | 0.000  | 0.000  |
| H2 | $\alpha$ -muurolene                                                               | 10208-80-7   | 0.000  | 0.000  | 0.000  | 23.614 |
| H3 | 1, 7, 7-Trimethyl-2-norbornene                                                    | 464-17-5     | 0.000  | 58.902 | 0.000  | 0.000  |
| H4 | Cyclododecane                                                                     | 294-62-2     | 0.000  | 0.000  | 4.609  | 0.000  |
| H5 | 4-Isopropyl-1-methylbenzene                                                       | 99-87-6      | 0.000  | 0.000  | 0.000  | 23.627 |
| H6 | Bicyclo [3. 2. 1] octane, 7-ethylidene-1, 2, 8, 8-tetramethyl-, (1R, 2R, 5R, 7E)- | 193695-14-6  | 0.000  | 0.000  | 28.531 | 0.000  |
| O1 | Methoxyphenyloxim                                                                 | 1000222-86-6 | 0.000  | 12.973 | 10.660 | 14.798 |
| O2 | 1, 4-Bis(trimethylsilyl)benzene                                                   | 13183-70-5   | 0.000  | 0.000  | 8.103  | 0.000  |
| O3 | Cyclooctasiloxane,hexadecamethyl-(7Cl, 8Cl, 9Cl)                                  | 556-68-3     | 0.000  | 18.693 | 0.000  | 0.000  |

---

|     |                                  |           |          |          |          |          |
|-----|----------------------------------|-----------|----------|----------|----------|----------|
| O4  | Decamethylcyclopenta<br>siloxane | 541-02-6  | 115.197  | 162.196  | 117.408  | 0.000    |
| O5  | Hexamethylcyclotrisil<br>oxane   | 541-05-9  | 0.000    | 0.000    | 0.000    | 6.551    |
| O6  | Octamethylcyclotetrasiloxane     | 556-67-2  | 0.000    | 0.000    | 7.256    | 0.000    |
| O7  | Dodecamethylcyclodioxasiloxane   | 540-97-6  | 147.167  | 306.362  | 176.457  | 51.803   |
| O8  | Dimethoxydimethylsilane          | 1112-39-6 | 15.259   | 0.000    | 0.000    | 75.827   |
| O9  | Silanediol, 1, 1-dimethyl-       | 1066-42-8 | 0.000    | 0.000    | 35.161   | 34.592   |
| Et1 | Dimethyl ether                   | 115-10-6  | 1986.189 | 3346.161 | 3321.422 | 4125.634 |

---
